# Supplementary material for: Electrochemical Biosensors Based on Convectively Assembled Colloidal Crystals
Source: MDPI journal article supplement (doi:10.3390/bios12070480), 2022-06-30
Supplement: s1 [file s1]

# Electrochemical Biosensors Based on Convectively Assembled Colloidal Crystals

Amane Shiohara <sup>1,2,3</sup>, Christopher D. Easton <sup>2</sup>, Beatriz Prieto-Simon <sup>4,5,\*</sup> and Nicolas H. Voelcker <sup>1,2,3,\*</sup>

<sup>1</sup> Drug Delivery, Deposition, and Dynamics, Monash Institute of Pharmaceutical Sciences, Monash University, Parkville, VIC 3052, Australia

<sup>2</sup> Commonwealth Scientific and Industrial Research Organisation (CSIRO), Clayton, VIC 3168, Australia

<sup>3</sup> Melbourne Centre of Nanofabrication, Victorian Node of the Australian National Fabrication Facility, Clayton, VIC 3168, Australia

<sup>4</sup> Department of Electronic Engineering, Universitat Rovira i Virgili, 43007 Tarragona, Spain

<sup>5</sup> ICREA, Pg. Lluís Companys 23, 08010 Barcelona, Spain

\* Correspondence: [beatriz.prieto-simon@urv.cat](mailto:beatriz.prieto-simon@urv.cat) (B.P.-S.); [nicolas.voelcker@monash.edu](mailto:nicolas.voelcker@monash.edu) (N.H.V.)

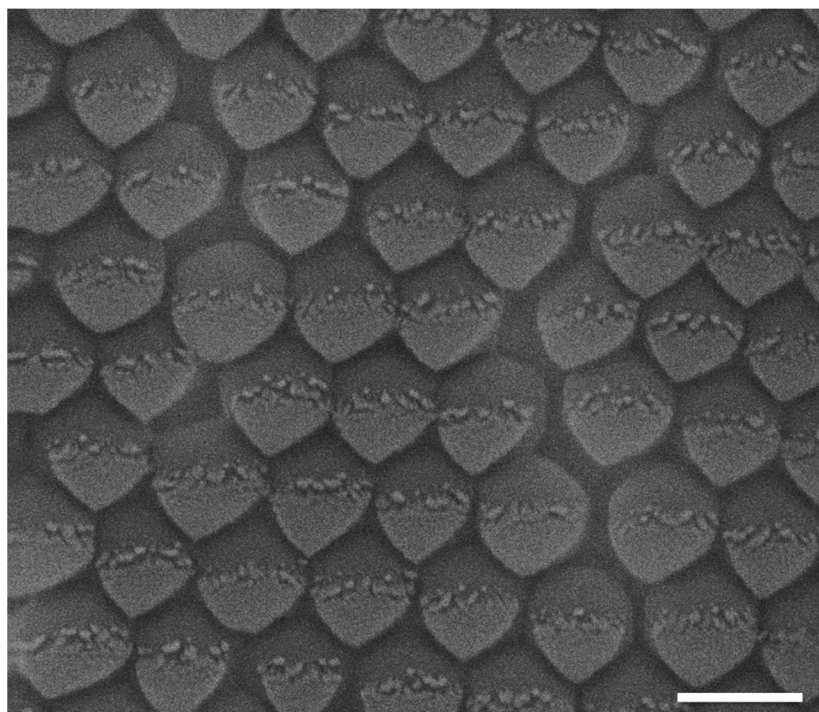

**Figure S1.** The SEM image shows a monolayer of the PS spheres with glancing angle deposition of silica conducted at 75° and rotation. The scale bar is 400 nm.

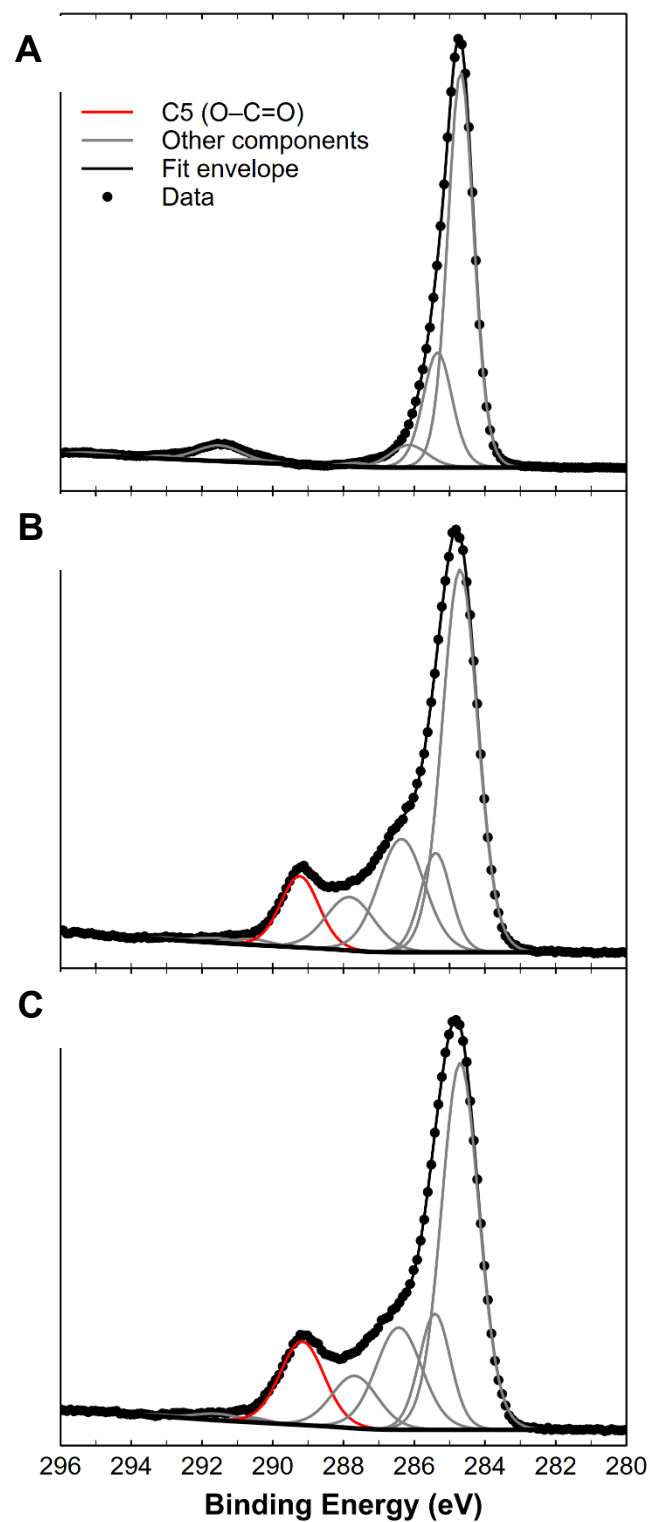

**Figure S2.** High-resolution C 1s spectra with peak fitting of the non-carboxylated PS sphere monolayers on gold electrodes exposed to UV ozone for A) 0 min, B) 1 min, and C) 5 min. Component C5 assigned to O-C=O groups is highlighted in red.

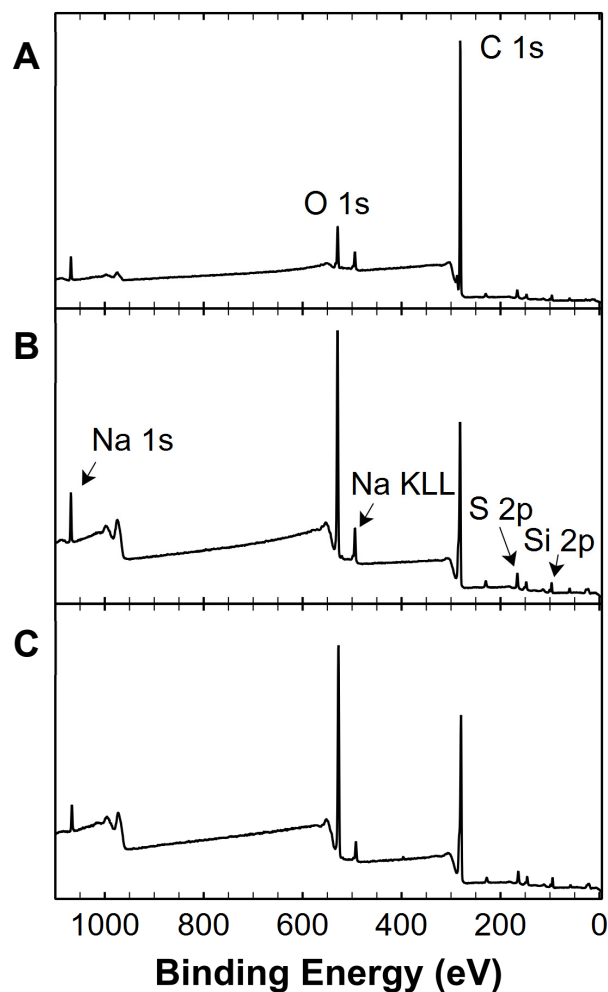

**Figure S3.** Survey spectra of non-carboxylated PS spheres monolayers on gold electrodes exposed to UV ozone for A) 0 min, B) 1 min, and C) 5 min.

**Table S1.** Elemental quantification derived from survey spectra (atomic % and atomic ratios O/C) and the amount of carbon associated with O-C=O from high-resolution C 1s spectra (atomic %, fit component C5) for the non-carboxylated PS spheres monolayers on gold electrodes from Figure S2 and S3, respectively. Results are an average of three analysis locations on a single sample.

| Sample ID   | C    | O    | O/C  | C5 (O-C=O) |
|-------------|------|------|------|------------|
| No UV ozone | 89.1 | 6.1  | 0.07 | 0.5        |
| 1 min       | 64.1 | 28.2 | 0.44 | 6.3        |
| 5 min       | 66.0 | 27.5 | 0.42 | 6.9        |

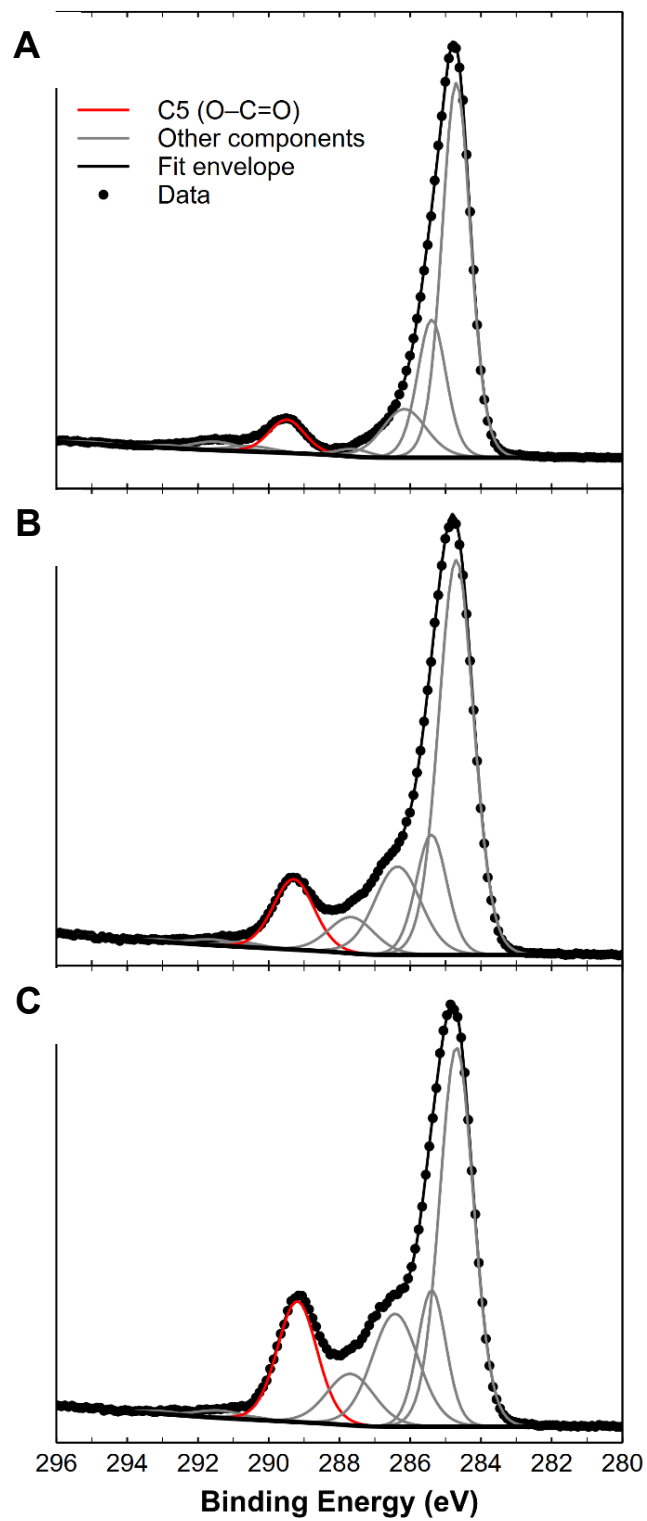

Figure S4. High-resolution C 1s spectra with peak fitting of the carboxylated PS sphere monolayers on gold electrodes exposed to UV ozone for A) 0 min, B) 1 min, and C) 5 min. Component C5 assigned to O-C=O groups is highlighted in red.

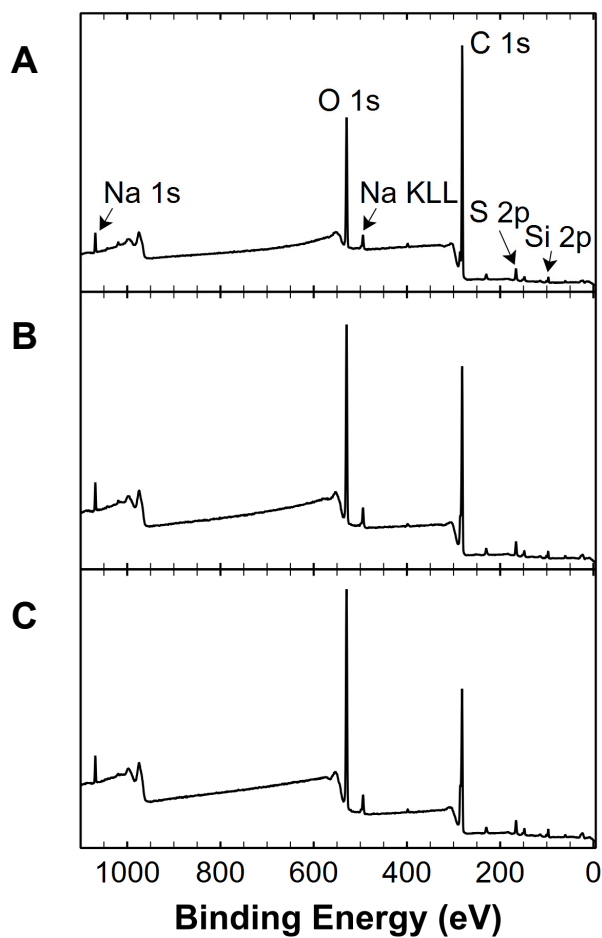

**Figure S5.** Survey spectra of carboxylated PS spheres monolayers on gold electrodes exposed to UV ozone for A) 0 min, B) 1 min, and C) 5 min.

**Table S2.** Elemental quantification derived from survey spectra (atomic % and atomic ratios O/C), and the amount of carbon associated with O-C=O from high-resolution C 1s spectra (atomic %, fit component C5) for the carboxylated PS spheres monolayers on gold electrodes from Figure S4 and S5, respectively. Results are an average of three analysis locations on a single sample.

| Sample ID   | C    | O    | O/C  | C5 (O-C=O) |
|-------------|------|------|------|------------|
| No UV ozone | 76.1 | 18.6 | 0.24 | 4.7        |
| 1 min       | 68.1 | 25.8 | 0.38 | 7.4        |
| 5 min       | 62.6 | 30.9 | 0.49 | 10.0       |

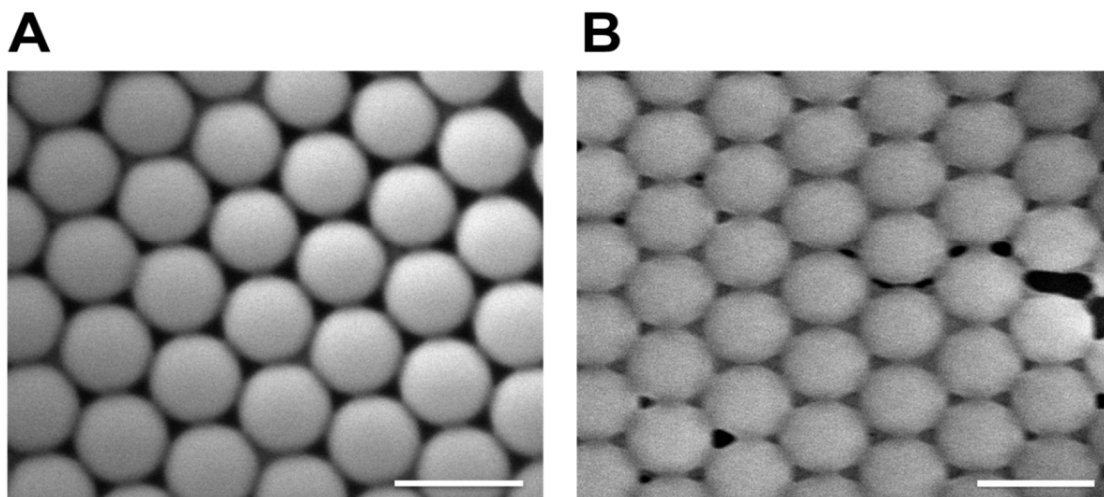

**Figure S6.** The SEM images of the monolayer of carboxylated PS spheres after being treated with UV-ozone for 1 min A), and 5 min B). The scale bar is 500 nm.

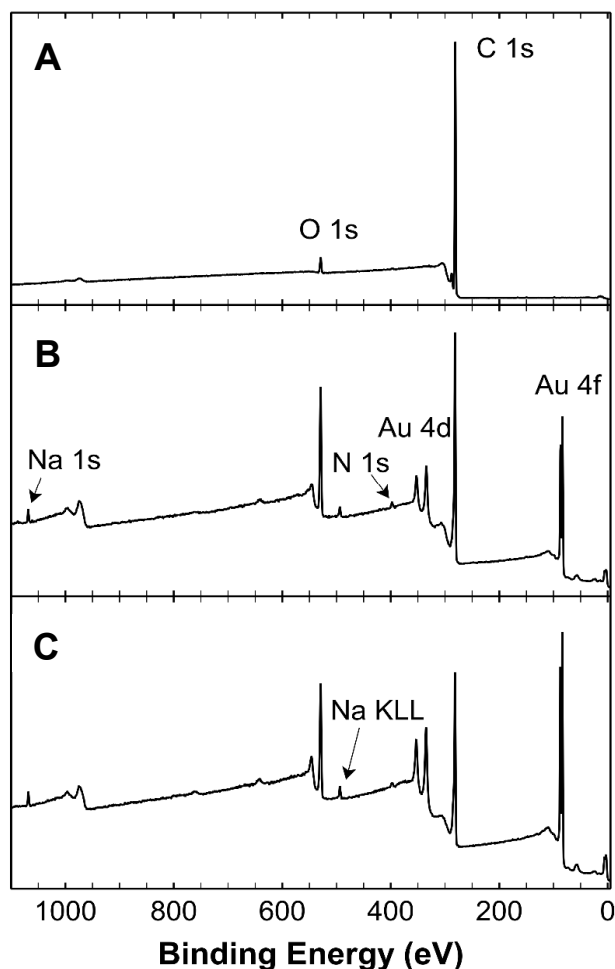

**Figure S7.** Survey spectra of carboxylated PS spheres monolayers on gold electrodes after A) no UV-ozone treatment, B) 1 min and C) 2 min UV-ozone treatment, all followed by EDC/NHS activation and streptavidin incubation.

**Table S3.** Elemental quantification derived from survey spectra (atomic and atomic ratios O/C), and the amount of carbon associated with O-C=O from high-resolution C 1s spectra (atomic %, fit component C5) for the COOH functionalised for the EDC/NHS activated PS spheres monolayers on gold electrodes from Fig S7. Results are an average of three analysis locations on a single sample.

| Sample ID                        | C    | O    | N   | O/C  | N/C   | C4 (C=O, O-C-O, N-C=O) |
|----------------------------------|------|------|-----|------|-------|------------------------|
| <b>No UV ozone treatment:</b>    |      |      |     |      |       |                        |
| + EDC/NHS                        | 96.1 | 3.2  | 0.5 | 0.03 | 0.005 | 0.3                    |
| + streptavidin                   | 85.7 | 9.8  | 0.1 | 0.12 | 0.001 | 1.0                    |
| + EDC/NHS + streptavidin         | 87.2 | 9.4  | 0.6 | 0.11 | 0.01  | 1.0                    |
| <b>1 min UV ozone treatment:</b> |      |      |     |      |       |                        |
| + EDC/NHS                        | 76.3 | 15.2 | 1.3 | 0.2  | 0.02  | 7.7                    |
| + streptavidin                   | 81.6 | 13.7 | 0.1 | 0.17 | 0.001 | 6.2                    |
| + EDC/NHS + streptavidin         | 77.7 | 16.7 | 1.2 | 0.22 | 0.02  | 6.2                    |

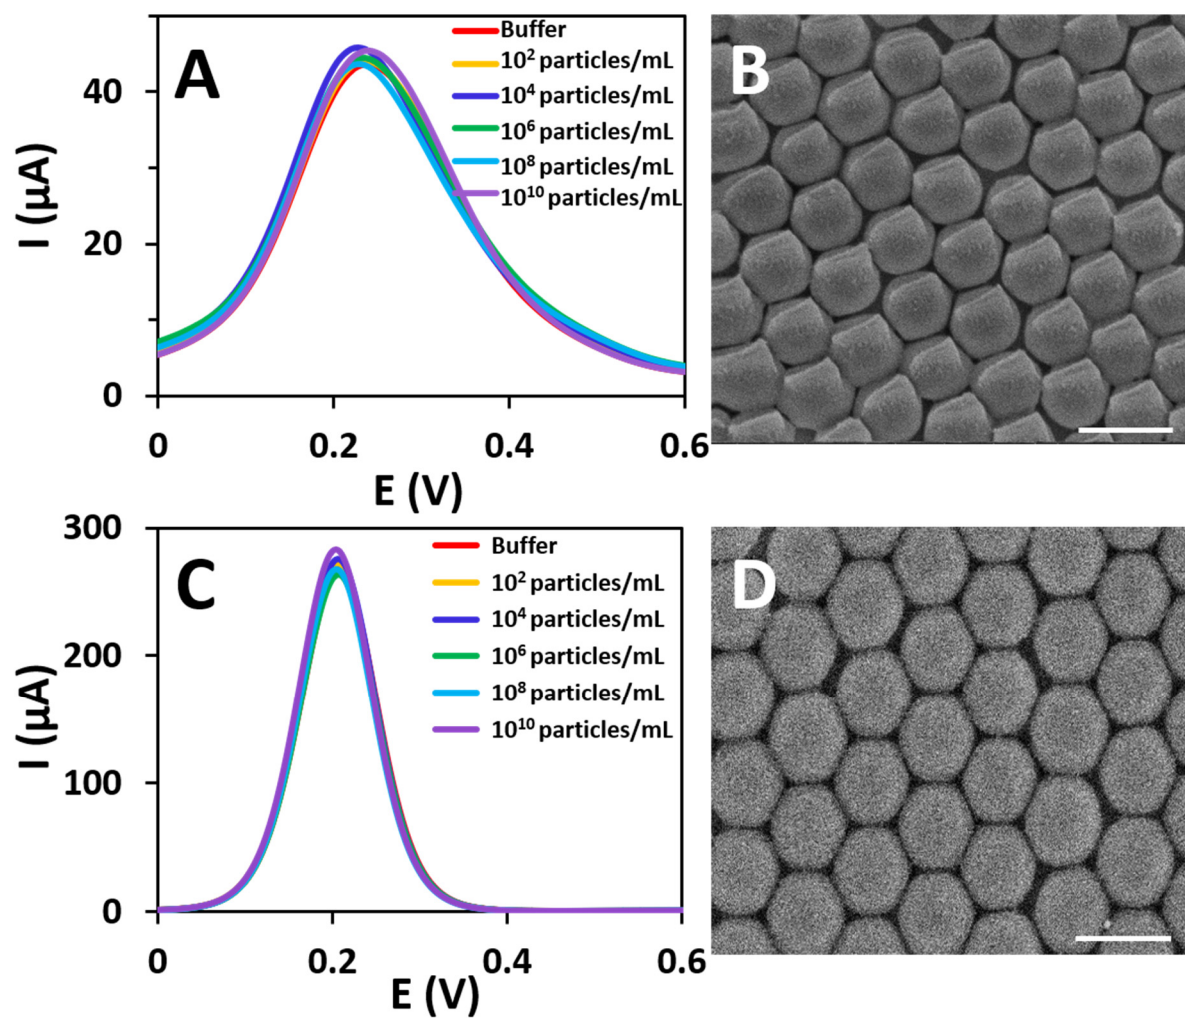

**Figure S8.** Differential pulse voltammograms obtained using a gold surface modified with a monolayer of streptavidin-modified polystyrene beads with A) and without C) silica deposited on top when incubating PEG-coated gold nanoparticles. The SEM images of the electrode with B) and without D) silica deposited on top after PEG-coated gold nanoparticles incubation. All scale bars are 500 nm.
